# Supplementary material for: Understanding the aggregation induced emission enhancement for a compound with excited state intramolecular proton transfer character
Source: Royal Society of Chemistry journal article supplement (doi:10.1039/c0cp01181a), 2010-12-20
Supplement: c0cp01181a.pdf [file c0cp01181a.pdf]

## Supporting Informations:

### Understanding the Aggregation Induced Emission Enhancement for a Compound with Excited State Intramolecular Proton Transfer Character

Rui Hu,<sup>a</sup> Shayu Li,<sup>\*a</sup> Yi Zeng,<sup>b</sup> Jinping Chen,<sup>b</sup> Shuangqing Wang,<sup>a</sup> Yi Li,<sup>\*b</sup> and Guoqiang Yang<sup>\*a</sup>

<sup>a</sup> Beijing National Laboratory for Molecular Sciences, Key laboratory of Photochemistry, Institute of Chemistry, Chinese Academy of Sciences, Beijing 100190, China. Fax: +86-10-82617315; Tel: +86-10-82617263. E-mail: gqyang@iccas.ac.cn, shayuli@iccas.ac.cn

<sup>b</sup> Key Laboratory of Photochemical Conversion and Optoelectronic Materials, Technical Institute of Physics and Chemistry, Chinese Academy of Sciences, Beijing 100190, P. R. China, E-mail: yili@mail.ipc.ac.cn.

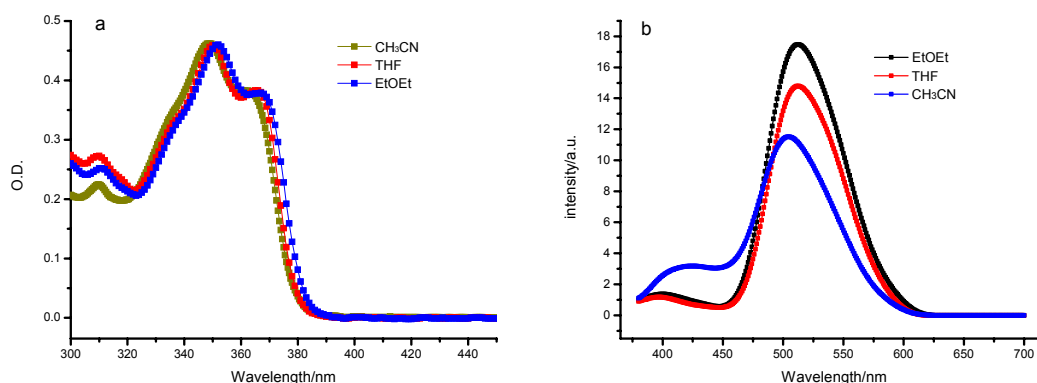

Figure S1. Absorption (a) and fluorescence (b) spectra of BTHPB in CH<sub>3</sub>CN, THF, EtOEt, respectively. concentration:  $1.0 \times 10^{-5}$  M; excitation at 360 nm

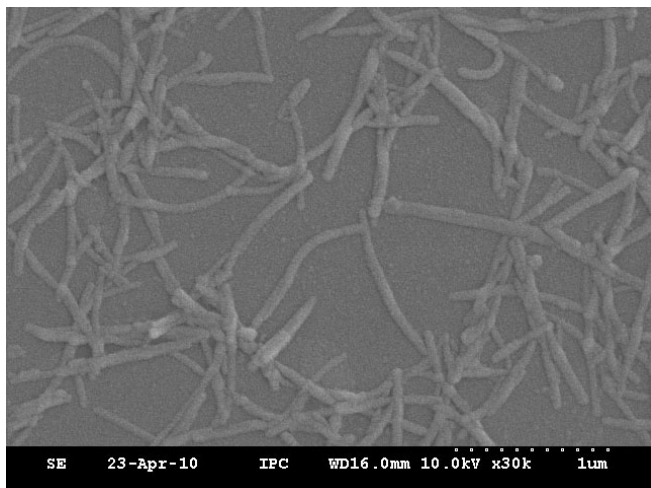

Figure S2. Image of BTHPB aggregates.

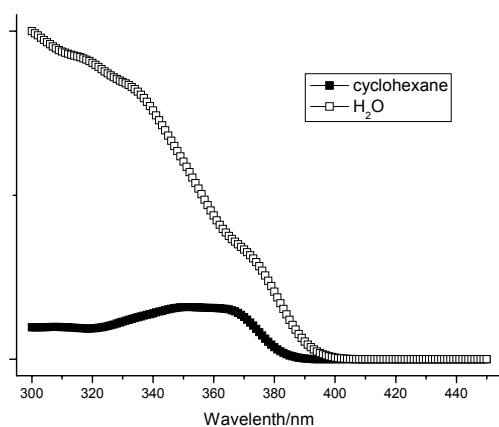

Figure S3. Excitation spectrum of BTHPB in cyclohexane (■) and water (□). Concentration:  $1.0 \times 10^{-5}$  M.  $\lambda_{em} = 509$  nm.

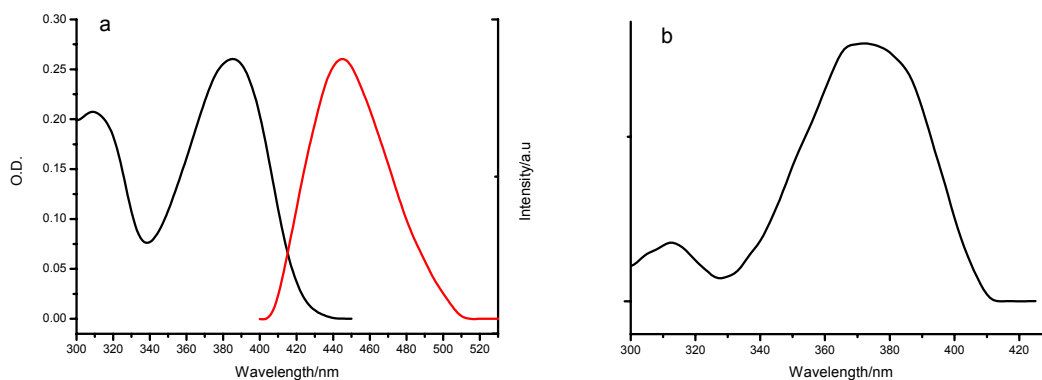

Figure S4. a) Absorption and fluorescence spectra of BTHPB in basic water (PH = 11); b) excitation spectrum of BTHPB in basic water (PH = 11), excitation at 385 nm. concentration:  $1.0 \times 10^{-5}$  M

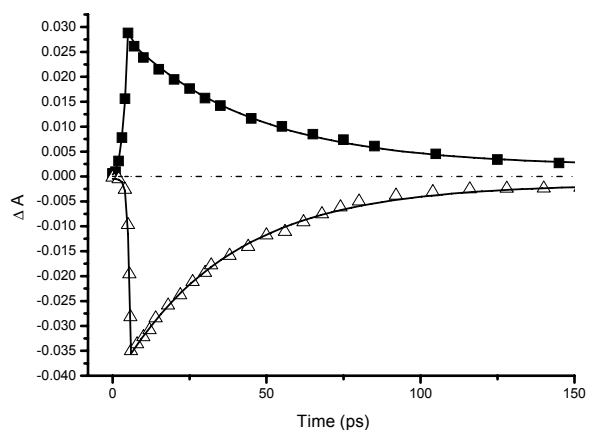

Figure S5. Kinetic traces of the transient absorption signals for BTHPB in THF, and the fits for the detection wavelengths 530 nm ( $\Delta$ ) and 660 nm ( $\blacksquare$ ).

Table S1 Calculated dipole moments and transition nature for BTHPB

|                                       | Dipole moment (debye)              | electronic transitions & oscillator strengths |
|---------------------------------------|------------------------------------|-----------------------------------------------|
| Ground state of enol tautomer         | 4.54<br>X=0.7992 Y=4.4564 Z=0.3262 | HOMO-LUMO 3.54 eV (0.878)                     |
| Lowest excited state of keto tautomer | 4.96<br>X=0.7313 Y=4.9068 Z=0.2495 | HOMO-LUMO 2.53 eV (0.135)                     |
